# Supplementary material for: A novel mesna-based electrochemical sensor embellished with silver nanoparticles for ultrasensitive analysis of modafinil
Source: Royal Society of Chemistry journal article supplement (doi:10.1039/d3ay01401k), 2023-01-01
Supplement: d3ay01401k1.pdf [file d3ay01401k1.pdf]

## Supplementary Material

### **A Novel Mesna-Based Electrochemical Sensor Embellished with Silver Nanoparticles for Ultrasensitive Analysis of Modafinil**

**Noha M. Hosny<sup>1\*</sup>, Mohamed I. Gadallah<sup>1</sup>, Ibrahim A. Darwish<sup>2</sup>**

<sup>1</sup> Pharmaceutical Analytical Chemistry Department, Faculty of Pharmacy, Assiut University, Assiut 71526, Egypt.

<sup>2</sup> Department of Pharmaceutical Chemistry, College of Pharmacy, King Saud University, P.O. Box 2457, Riyadh 11451, Saudi Arabia.

---

**\*Corresponding author:** Noha M. Hosny

---

Email: [noha.hosni@aun.edu.eg](mailto:noha.hosni@aun.edu.eg)

Mobile No: +2-011-44438525

Fax No: 0020-88-2080774

---

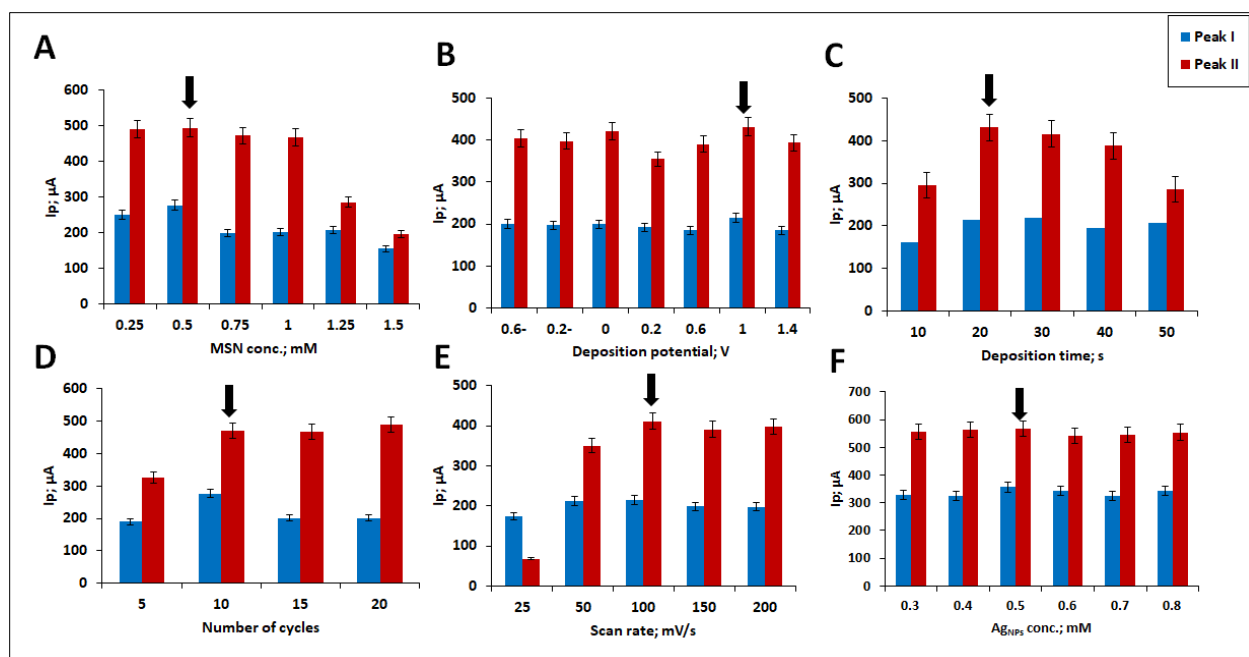

**Fig. S1:** Factors affecting the formation of MSN encrusted with silver nanoparticles on PGE surface: **A.** MSN concentration, **B.** deposition potential and **C.** time, **D.** number of cycles, **E.** scan rate, and **F.** silver nanoparticles concentration required for deposition process.

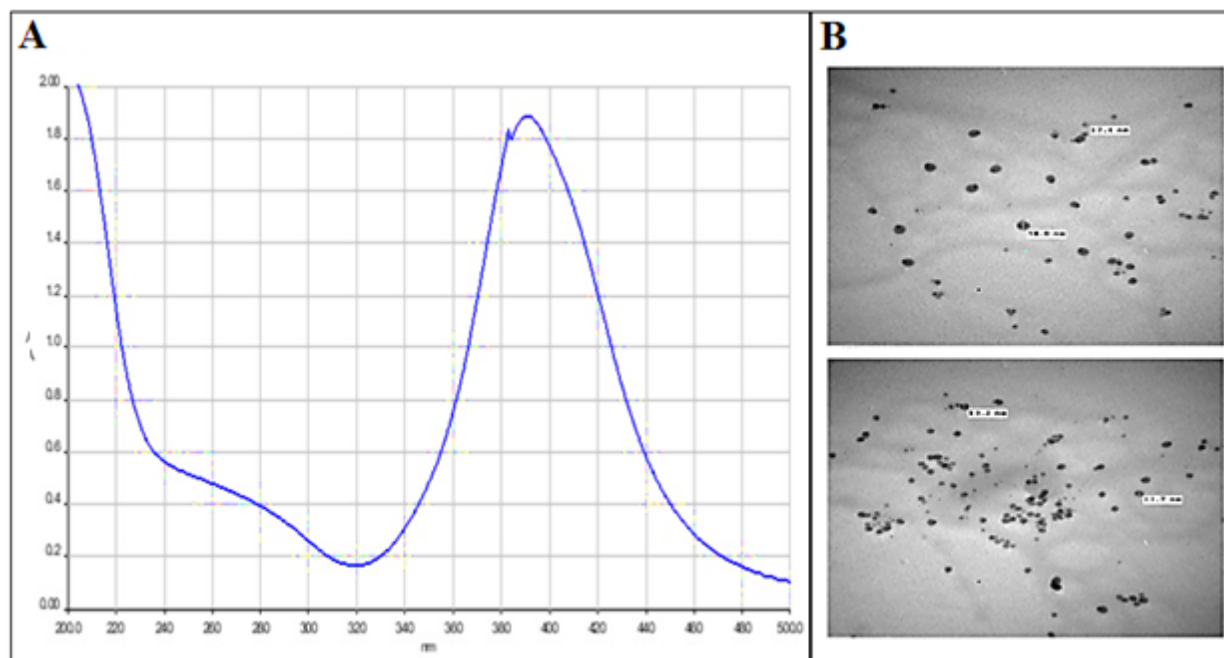

**Fig. S2:** **A.** UV spectrum and **B.** TEM images of the prepared AgNPs.

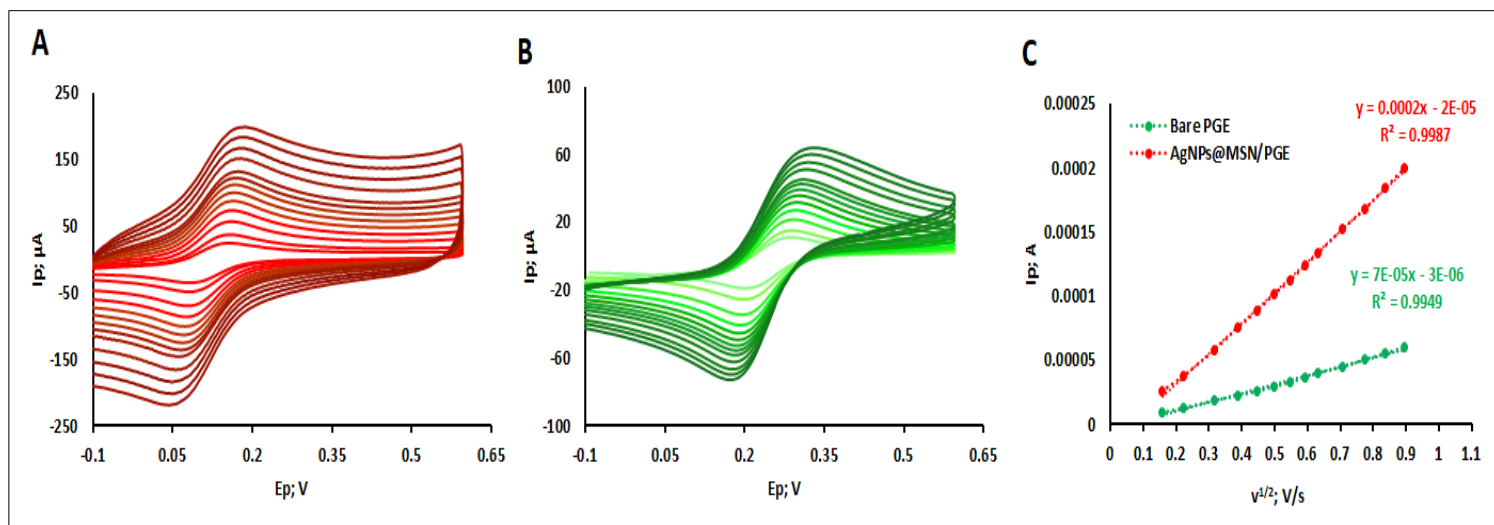

**Fig. S3:** Voltammograms of  $[\text{Fe}(\text{CN})_6]^{3-}/[\text{Fe}(\text{CN})_6]^{4-}$  mixture (1.0 mM) in KCl (0.5 M) recorded at **A.**  $\text{AgNPs}@/\text{MSN}/\text{PGE}$  and **B.** bare PGE electrodes over potential of -0.2 to 0.6 V and scan rate of 0.025-0.800  $\text{V} \cdot \text{s}^{-1}$ . **C.** is the plot of peak current against the square root of scan rate.

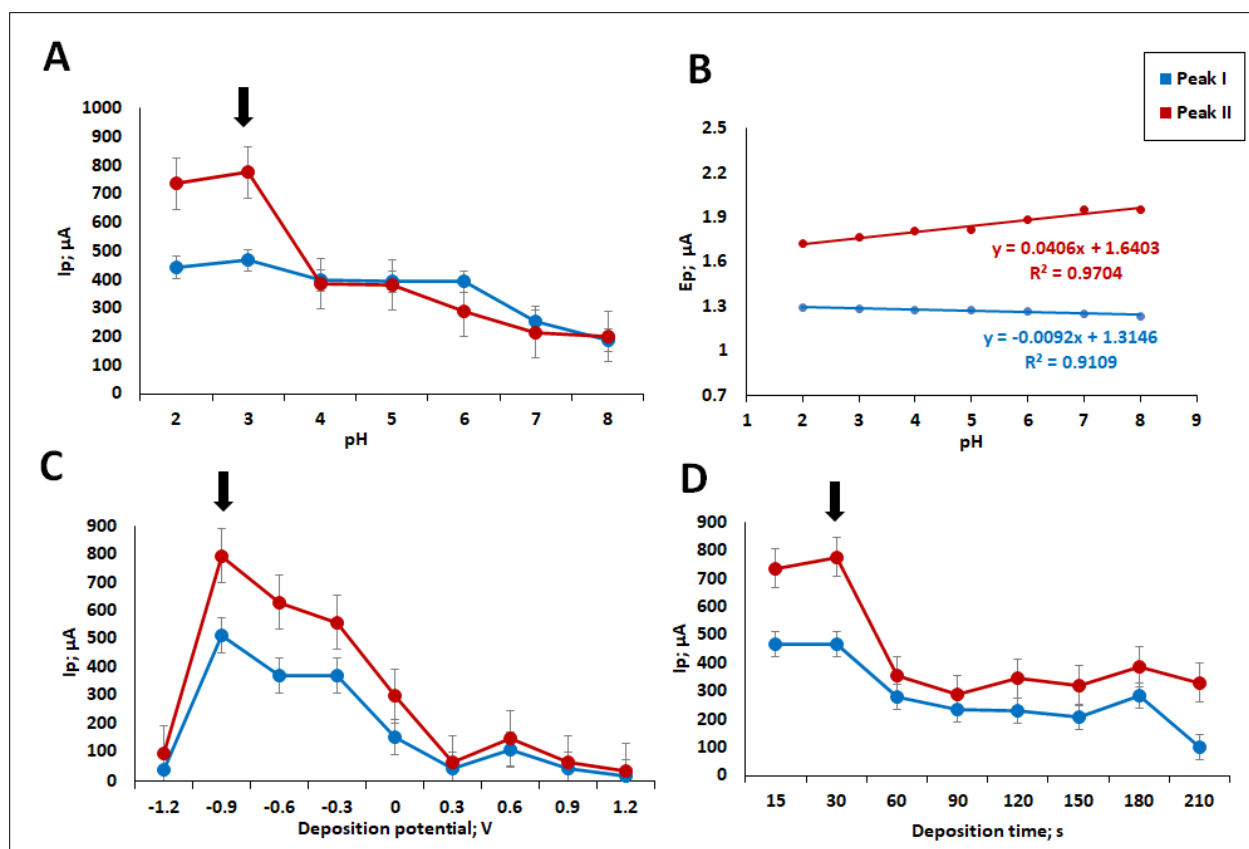

**Fig. S4:** **A.** The influence of different pHs of the supporting electrolyte (0.04 M of B.R buffer solutions) on the oxidation of MOD (0.3 mM) at AgNPs@MSN/PGE sensor. **B.** Linear curve of potential ( $E_p$ ) against pH of the supporting electrolyte. **C** and **D** are the effects of deposition potential and time on the current intensities of MOD, respectively.
